# Supplementary material for: Assessment of Groundwater Quality and Exposure Risks in a Rural Mining District of Ghana Using Multivariate and Probabilistic Approaches
Source: Research Square preprint supplement (doi:10.21203/rs.3.rs-7031098/v1), 2025-08-27
Supplement: Supplementary file 1 [file 6c9db59a8e6b314ad0d5f6fb.docx]

**Reference dose (RfD)** values (in mg/kg/day):

| **Element** | **RfD_ing** | **RfD_derm** |
| --- | --- | --- |
| Cu | 0.04 | 0.012 |
| Ni | 0.02 | 0.0054 |
| Pb | 0.0035 | 0.000525 |
| Zn | 0.3 | 0.06 |
| Hg | 0.0003 | 0.000021 |
| As | 0.0003 | 0.000123 |

Cancer slope factors (CSFs)

| **Element** | **CSF_ing** | **CSF_derm** |
| --- | --- | --- |
| Ni | 0.84 | 0.84 |
| Pb | 0.0085 | 0.0085 |
| As | 1.5 | 1.5 |

Sources: (U.S. EPA, 2000, 2011, 2012; Miletić et al., 2023)

Uncertainty Quantification for Probabilistic HHRA

| **Parameter** | **Adult Mean ± SD** | **Child Mean ± SD** |
| --- | --- | --- |
| IR (L/day) | 2.2 ± 0.44 | 1.8 ± 0.36 |
| SA (cm²) | 18,000 ± 3,600 | 6,600 ± 1,320 |
| BW (kg) | 70 ± 14 | 15 ± 3 |
| ET (unitless) | 0.58 ± 0.116 | 0.58 ± 0.116 |
| EF (days/year) | 365 ± 73 | 365 ± 73 |
| ED (years) | 30 ± 6 | 6 ± 1.2 |
| CF | 0.001 ± 0.0002 | 0.001 ± 0.0002 |

REFERENCES

U.S. Environmental Protection Agency (EPA). (2000). Risk assessment guidance for superfund: Volume I—Human health evaluation manual (Part E, Supplemental guidance for dermal risk assessment) (EPA/540/R/99/005). Washington, DC: Office of Emergency and Remedial Response.

U.S. Environmental Protection Agency (EPA). (2012). Regional screening levels (RSLs) – Generic tables (November 2012). Washington, DC: Office of Superfund Remediation and Technology Innovation.

U.S. Environmental Protection Agency (EPA). (2011). Exposure factors handbook: 2011 edition (EPA/600/R-09/052F). Washington, DC: National Center for Environmental Assessment, Office of Research and Development.

U.S. Environmental Protection Agency (EPA). (2023). Integrated Risk Information System (IRIS).

Miletić, A., Lučić, M., & Onjia, A. (2023). Exposure factors in health risk assessment of heavy metal (loid) s in soil and sediment. Metals, 13(7), 1266.
